# Supplementary material for: Transmissibility of 1918 pandemic influenza
Source: Springer Nature journal article supplement (doi:10.1038/nature03063), 2004-12-01
Supplement: 41586_2004_BFnature03063_MOESM2_ESM.pdf [file 41586_2004_BFnature03063_MOESM2_ESM.pdf]

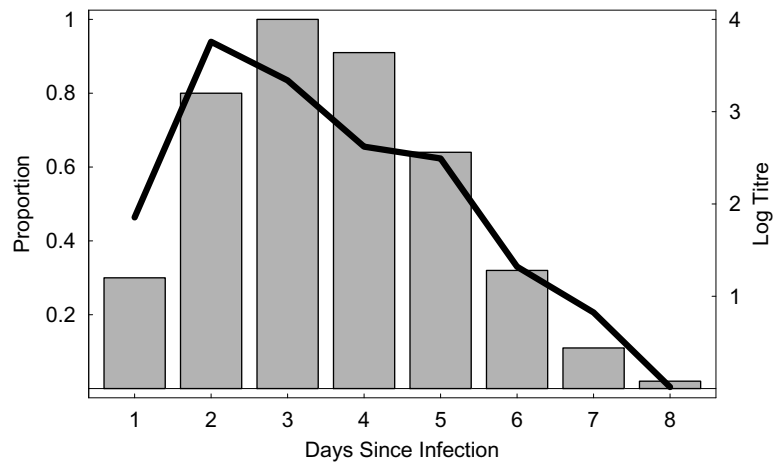

Supplementary Figure 1: Histogram of the proportion of infected hosts assumed to be infectious between 1 and 8 days post infection in the model (supp. ref. 1). The black line shows the mean of nasal lavage fluid virus titres (logarithm of the median tissue culture infective doses per ml) from a sample experimental infection of 20 volunteers with influenza A/Texas/36/91 (supp. ref. 5).
