# Supplementary material for: Transmissibility of 1918 pandemic influenza
Source: Springer Nature journal article supplement (doi:10.1038/nature03063), 2004-12-01
Supplement: 41586_2004_BFnature03063_MOESM3_ESM.pdf [file 41586_2004_BFnature03063_MOESM3_ESM.pdf]

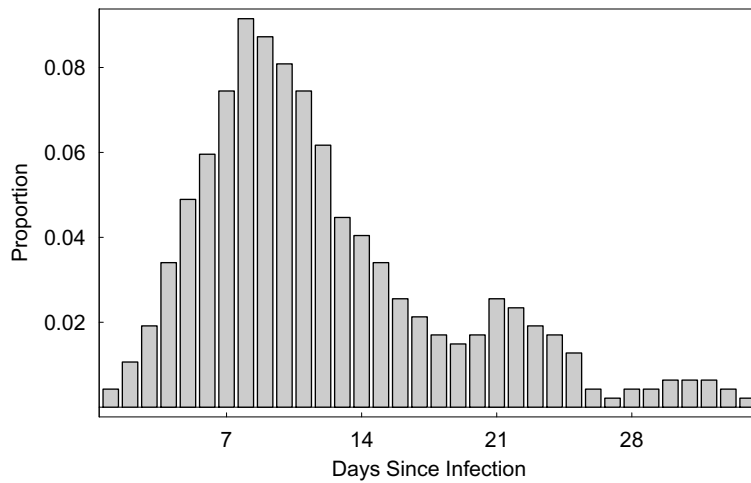

Supplementary Figure 2: Histogram of the proportion of all deaths occurring on each day in the five weeks following infection. A five-day moving average was applied to the distribution of deaths extracted from 94 autopsy reports (supp. ref. 11-13).
